# Supplementary material for: Identification of oncolytic vaccinia restriction factors in canine high-grade mammary tumor cells using single-cell transcriptomics
Source: PLoS Pathog. 2020 Oct 19;16(10):e1008660. doi: 10.1371/journal.ppat.1008660 (PMC7595618; doi:10.1371/journal.ppat.1008660)
Supplement: S4 Table — (XLSX) [file ppat.1008660.s009.xlsx]

## Sheet: Feuil1
S4 Table
Gene	avg logFC Exp1	p_val_adj Exp1	avg logFC Exp2	p_val_adj Exp2
ACLY	-0.329284	6.54e-11	-0.349045	6.54e-24
ACTB	-0.469139	3.95e-45	-0.334627	1.73e-28
ACTN1	-0.475298	6.65e-31	-0.558512	9e-68
ADAM19	-0.424573	4.99e-10	-0.415183	2.65e-09
ADRM1	-0.456187	9.27e-27	-0.303533	1.41e-18
AKT1S1	-0.32099	4.4e-15	-0.304187	4.3e-19
ALAS1	-0.552637	1.29e-11	-0.276852	1.89e-06
AMOTL2	-0.764687	4.89e-48	-0.81213	2.66e-55
APEX1.1	-0.46948	3.92e-28	-0.404987	2.23e-28
BGN	-0.298509	1.17e-06	-0.316516	2.21e-06
BHLHE40	-1.07123	2.75e-73	-0.89548	3.12e-85
BRD2	-0.282715	9.31e-12	-0.346227	6.36e-25
C10orf90	-0.379742	4.16e-26	-0.277591	1.66e-13
C1orf52	-0.343773	6e-14	-0.282482	1.3e-14
CALD1	-0.334641	3.22e-15	-0.293599	3.6e-08
CCT3	-0.376824	4.26e-19	-0.28291	4.58e-10
CKAP4	-0.313272	2.4e-18	-0.332714	9.82e-21
CKB	-0.617275	4.26e-33	-0.266883	5.22e-07
COL1A1	-1.1623	3.67e-20	-0.730384	9.08e-05
COL1A2	-0.786758	1.01e-33	-0.844786	6.83e-07
COL5A1	-0.524523	8.65e-18	-0.678213	6e-07
COL5A2	-0.447683	1.09e-24	-0.560274	6.61e-19
COLGALT1	-0.270374	2.08e-07	-0.265521	6.61e-06
CORO1C	-0.26787	4.52e-09	-0.260001	1.04e-09
CSRP1	-0.779237	9.49e-66	-0.522105	3.18e-52
CYP1B1	-0.904765	2.51e-10	-0.746987	1.4e-10
DAPK3	-0.40359	1.52e-23	-0.340236	1.11e-17
DBI	0.355409	2.4e-17	0.263517	9.81e-05
DDIT4	-1.51054	8.38e-55	-0.838454	9.5e-36
DPF2	-0.269493	1.29e-10	-0.300358	5.31e-18
DPP4	-0.541506	1.02e-23	-0.415939	3.04e-06
DPYSL3	-0.327376	7.72e-10	-0.263049	0.00841593
DUSP1	-0.505651	1.08e-07	-0.773989	1.62e-35
EDN1	-0.680654	4.15e-08	-0.715933	0.00586308
EMP3	-0.427272	3.55e-21	-0.351076	0.000474705
ENSCAFG00000000345	-0.350996	5.34e-16	-0.295768	7.63e-13
ENSCAFG00000000657	-0.306984	7.3e-16	-0.474942	1.94e-37
ENSCAFG00000004420	-0.424824	6.85e-26	-0.455149	4.67e-45
ENSCAFG00000006436	-0.280816	9.86e-08	-0.370744	4.81e-25
ENSCAFG00000008938	-0.293889	7.37e-13	-0.449919	3.23e-32
ENSCAFG00000010572	-0.465263	1.88e-27	-0.434061	1.62e-22
ENSCAFG00000014776	-0.490637	5.97e-36	-0.391713	3.12e-25
ENSCAFG00000018018	-0.390383	1.4e-26	-0.26549	1.71e-17
ENSCAFG00000018572	-0.294988	3.06e-09	-0.262049	2.3e-06
ENSCAFG00000031808	-0.488654	1.08e-20	-0.528014	1.45e-47
ENSCAFG00000032813	-1.04448	9.91e-52	-1.34195	9.31e-130
ENSCAFG00000034881	-0.39072	9.81e-15	-0.413049	6.16e-23
ENSCAFG00000036997	0.486268	1.54e-22	0.441798	7.25e-31
ERAL1	-0.387475	4.27e-25	-0.421435	3.1e-29
FADS1	-0.383914	4.02e-10	-0.357537	1.25e-13
FAM189B	-0.337543	2.2e-14	-0.30925	5.56e-15
FAM214B	-0.312326	2.95e-14	-0.2968	7.53e-17
FN1	-0.608543	1.11e-26	-0.406097	2.89e-26
FOXP4	-0.536399	1.13e-32	-0.456108	5.03e-36
FSTL1	-0.279191	5.5e-11	-0.450216	4.05e-13
GADD45B	-0.884708	9.68e-48	-0.432057	1.68e-11
GATSL3	-0.261273	4.05e-12	-0.293556	1.46e-14
GMPPA	-0.399459	1.68e-21	-0.338022	3.9e-19
GOLPH3L	0.29608	5.14e-08	0.36209	1.09e-14
HAS2	-0.834313	2.55e-24	-1.43367	7.2e-112
HDGF	-0.329165	1.39e-13	-0.277245	1.55e-10
HINT2	-0.350314	3.38e-25	-0.276892	2.35e-14
HIST1H1C	0.507981	5.45e-18	0.972567	3.39e-34
HSPBP1	-0.302708	2.61e-14	-0.314938	2.6e-18
ICAM1	-0.278006	0.000285402	-0.30837	0.000203607
IFRD1	-0.506877	1.97e-29	-0.354765	1.61e-14
ILK	-0.663747	2.23e-45	-0.329545	2.49e-17
IMPDH1	-0.359546	2.29e-19	-0.305842	1.72e-17
INHBA	-0.705315	2.1e-17	-0.673841	8.23e-21
INSIG1	-0.517884	1.55e-09	-0.722617	1.39e-20
ITGA5	-0.630698	2.05e-14	-0.645927	2.83e-21
JOSD2	-0.511814	5.92e-39	-0.254008	4.52e-12
KCTD10	-0.729372	1.66e-56	-0.572837	9.55e-56
LMNA	-0.679396	4.23e-72	-0.537495	8.19e-43
LTBP1	-0.413304	1.47e-13	-0.261727	6.14e-07
LYPLA2	-0.276981	8.23e-12	-0.255168	6.56e-12
MT2A	-0.921354	1.43e-48	-0.842733	2.65e-22
MYC	-0.346997	1.78e-07	-0.537321	2.49e-25
MYH9	-0.307629	1.25e-12	-0.390896	1.59e-31
MYO1C	-0.308123	2.61e-18	-0.391653	5.56e-29
NEDD9	-0.453082	5.38e-16	-0.796264	1.95e-35
NFIC	-0.586163	3.46e-53	-0.321885	2.83e-18
NFKBIB	-0.258152	7.58e-11	-0.477573	1.43e-41
NIPAL1	-0.343597	2.6e-08	-0.348611	6.51e-11
NRP2	-0.302486	4.63e-11	-0.328121	1.15e-10
NUAK1	-0.270996	3.22e-06	-0.80355	1.8e-67
PALLD	-0.30724	3.94e-07	-0.560157	1.09e-34
PDE4B	-0.748363	4.21e-46	-0.298795	7.76e-12
PDLIM4	-0.314449	2.73e-10	-0.470582	1.59e-09
PES1	-0.2502	9.28e-12	-0.25354	2.39e-10
PLAU	-0.988166	1.23e-23	-0.694748	2.44e-27
PLAUR	-0.386066	8.95e-05	-0.592923	0.000114806
PPP4R2	0.455421	4.8e-26	0.25079	1.55e-09
PRKCDBP	-0.391058	2.62e-22	-0.290215	3.04e-13
PTGS2	-1.21267	3.5e-13	-0.648758	0.000918607
PTRF	-0.778508	1.51e-70	-0.785306	6.15e-84
RAB34	-0.307067	6.25e-12	-0.319268	2.35e-18
RABL6	-0.525212	1.54e-41	-0.271451	1.55e-14
RGS2	-1.25157	2.85e-16	-0.476504	0.00921717
RND3	-0.363152	0.000152199	-0.270195	2.78e-06
S100A16	-0.465599	6.51e-44	-0.269932	3.87e-20
SERPINE1	-1.54422	5.2e-78	-1.00034	4.07e-47
SF3A1	-0.30117	2.7e-15	-0.350213	5.42e-26
SH3BP5L	-0.479466	3.89e-25	-0.269369	1.45e-11
SLC20A1	-0.415956	6.88e-09	-0.783359	1.75e-82
SNAI1	-0.641639	4.27e-19	-0.256041	7.02e-06
SNAI2	-0.503865	5.92e-06	-0.848146	5.27e-30
SRF	-0.280447	2.38e-12	-0.309515	9.19e-16
SRM	-0.388818	1.2e-18	-0.303464	1.17e-09
STARD13	-0.336035	5.63e-11	-0.330862	1.64e-15
STUB1	-0.273849	1.05e-12	-0.257672	6.29e-12
TBCB	-0.477655	1.93e-30	-0.379344	4.24e-25
TCF25	-0.331268	3.12e-18	-0.283428	4.49e-13
TCF7L1	-0.273801	3.29e-11	-0.316801	6.6e-17
TGFBR2	-0.269221	7.4e-08	-0.337668	2.41e-13
THBS1	-1.08441	3.01e-71	-0.620253	1.32e-17
THOC7	-0.314026	2.53e-18	-0.259127	1.25e-13
TIMM8B	-0.257518	1.43e-09	-0.253825	1.46e-13
TKT	-0.470141	1.5e-22	-0.298198	8.36e-11
TMEM183A	-0.256216	6.19e-12	-0.342577	2.44e-24
TPI1	-0.577774	3.45e-52	-0.364176	2.86e-21
TRIB2	-0.312243	4.15e-09	-0.415572	1.22e-21
TSC22D3	-0.49345	1.4e-16	-0.564867	5.7e-21
VCAN	-0.585749	5.22e-25	-0.267065	0.00625574
VEGFA	-0.413959	1.57e-08	-0.382806	2.44e-08
WDR1	-0.288798	2.81e-16	-0.301814	9.11e-19
WDR83OS	-0.443049	3.78e-35	-0.374351	6.7e-35
ZFP36	-0.451998	1.02e-09	-0.29408	0.000102824
ZNF703	-0.290868	2.27e-10	-0.349563	5.4e-20
ZYX	-0.764048	9.42e-58	-0.689141	2.07e-76
